# Supplementary material for: Axial chirality control of tropos BIPHEP–Rh complexes by chiral dienes: synergy effect in catalytic asymmetric hydrogenation
Source: Royal Society of Chemistry journal article supplement (doi:10.1039/b809683j), 2008-01-01
Supplement: b809683j.pdf [file b809683j.pdf]

## Supporting Information

Kohsuke Aikawa, Yūki Takabayashi, Susumu Kawauchi, and

Koichi Mikami\*

[\*] Prof. Dr. K. Mikami

Department of Applied Chemistry

Graduate School of Science and Engineering

Tokyo Institute of Technology

Ookayama, Meguro-ku, Tokyo 152-8552 (Japan)

FAX: (+81)3-5734-2776

e-mail: mikami.k.ab@m.titech.ac.jp

### General:

$^1\text{H}$ ,  $^{13}\text{C}$ , and  $^{31}\text{P}$  NMR spectra were measured on Bruker AV300M (300 MHz) spectrometer. Chemical shift of  $^1\text{H}$  NMR was expressed in parts per million downfield from tetramethylsilane as an internal standard ( $\delta = 0$ ) in  $\text{CDCl}_3$ . Significant  $^1\text{H}$  NMR data were tabulated in the following order: multiplicity (s: singlet; d: doublet; t: triplet; q: quartet; br: broad; m: multiplet) and coupling constants ( $J$ ) are reported (Hz). Chemical shifts of  $^{13}\text{C}$  NMR were expressed in parts per million downfield from  $\text{CDCl}_3$  as an internal standard ( $\delta = 77.0$ ) in  $\text{CDCl}_3$ . Chemical shifts of  $^{31}\text{P}$  NMR were expressed in parts per million downfield from 85%  $\text{H}_3\text{PO}_4$  as an external standard ( $\delta = 0$ ) in  $\text{CDCl}_3$ .

Analytical thin layer chromatography (TLC) was performed on a glass plates pre-coated with silica-gel (Merck Kieselgal 60 F<sub>254</sub>, layer thickness 0.25 mm). Visualization was accomplished by UV light (254 nm), anisaldehyde,  $\text{KMnO}_4$ . Column chromatography was performed on KANTO Silica Gel 60N (spherical, neutral).

Capillary gas chromatographic analysis (GC) was conducted on Shimadzu GC-14B instrument equipped with FID detector and capillary column coated with PEG-20 M by using  $\text{N}_2$  as a carrier gas. Peak area was calculated by Shimadzu C-R6A as an automatic integrator. CP-Chirasil-Dex CB (i.d. 0.25 mm x 25 m, CHROMPACK; GL Science) was used as a chiral column.

Optical rotations were measured on a JASCO DIP-370.

IR spectra were measured on a JASCO FT/IR-4200 spectrometer.

Elemental analyses were measured on a LECO CHNS-932 (Center for Advanced Materials Analysis in Tokyo Institute of Technology).

## C<sub>1</sub>-diene (2)

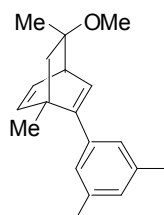

To a mixture of 3,5-dimethylphenylboronic acid (112.5 mg, 0.75 mmol) and trifluoromethanesulfonic acid 8-methoxy-1,8-dimethyl-bicyclo[2.2.2]octa-2,5-dien-2-yl ester<sup>1</sup> (156.2 mg, 0.5 mmol) in THF (8.0 mL) and 2.0M K<sub>2</sub>CO<sub>3</sub>/H<sub>2</sub>O (8.0 mL) was added Pd(PPh<sub>3</sub>)<sub>4</sub> (11.6 mg, 0.01 mmol). The reaction mixture was refluxed for 18 h. After cooling to room temperature, THF was evaporated under reduced pressure. The solution was extracted with ether 3 times. The organic layer was washed with brine, and then dried over NaSO<sub>4</sub>. After evaporated under reduced pressure, the residue was purified by silica-gel chromatography (hexane/ethyl acetate = 10/1) to give diene **2** (yield 82%).

<sup>1</sup>H NMR (300 MHz, CDCl<sub>3</sub>) δ 1.320 (s, 3H), 1.324 (d, *J* = 11.7 Hz, 1H), 1.34 (s, 3H), 1.65 (d, *J* = 11.7, 1H), 2.32 (s, 6H), 3.24 (s, 3H), 3.64 (td, *J* = 6.3, 1.2 Hz, 1H), 6.16 (td, *J* = 6.0, 1.2 Hz, 2H), 6.39 (t, *J* = 6.9 Hz, 1H), 6.78 (s, 2H), 6.90 (s, 1H).

<sup>13</sup>C NMR (75 MHz, CDCl<sub>3</sub>) δ 21.24, 21.71, 24.77, 45.33, 47.59, 49.86, 50.70, 84.09, 126.23, 128.09, 130.85, 134.06, 136.94, 139.49, 141.71, 150.05.

[α]<sub>D</sub><sup>20</sup> = -22.3 (c = 0.36 in CHCl<sub>3</sub>).

## C<sub>2</sub>'-diene (3)<sup>2</sup>

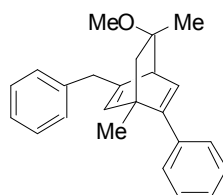

The titled compound was prepared according to the reported procedure.<sup>2</sup>

<sup>1</sup>H NMR (300 MHz, CDCl<sub>3</sub>) δ 1.34 (s, 3H), 1.36 (s, 3H), 1.50 (d, *J* = 12.0 Hz, 1H), 1.63 (d, *J* = 12.0 Hz, 1H), 3.29 (s, 3H), 3.40 (dd, *J* = 6.6, 1.8 Hz, 1H), 3.52 (dd, *J* = 15.9, 1.8 Hz, 1H), 3.77 (d, *J* = 15.9 Hz, 1H), 5.85 (s, 1H), 6.07 (d, *J* = 6.6 Hz, 1H), 7.11-7.14 (m, 2H), 7.20-7.37 (m, 8H).

<sup>13</sup>C NMR (75 MHz, CDCl<sub>3</sub>) δ 22.09, 25.13, 41.12, 45.18, 50.40, 50.87, 51.22, 84.07, 126.06, 126.72, 127.88, 128.12, 128.35, 129.32, 131.61, 133.35, 139.67, 147.14, 152.02.

Anal. Calcd for C<sub>14</sub>H<sub>26</sub>O: C, 87.23; H, 7.93%. Found: C, 87.09; H, 8.22%.

## [Rh(biphep)(cod)](SbF<sub>6</sub>) (1a-Rh/cod)

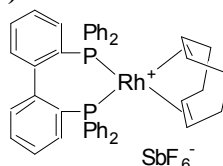

To a mixture of [Rh(cod)<sub>2</sub>]SbF<sub>6</sub> and BIPHEP **1a** (1.0 eq.) was added dry dichloromethane under argon atmosphere, and stirred for 1 h at room temperature. After evaporation under reduced pressure, the resultant residue was washed with a few ml of Et<sub>2</sub>O 3 times and dried *in vacuo* to give the titled compound quantitatively as orange powder.

<sup>1</sup>H NMR (300 MHz, CDCl<sub>3</sub>) δ 2.02 (m, 2H), 2.19 (m, 2H), 2.51 (m, 2H), 2.76 (m, 2H), 4.62

(m, 2H), 4.70 (m, 2H), 6.34 (m, 2H), 6.80-7.20 (m, 8H), 7.44-7.70 (m, 18H).  
 $^{31}\text{P}$  NMR (121 MHz,  $\text{CDCl}_3$ )  $\delta$  24.8 (d,  $J_{\text{Rh-P}} = 145.0$  Hz).

### [Rh(cod) $_2$ ](BAr $_F$ )

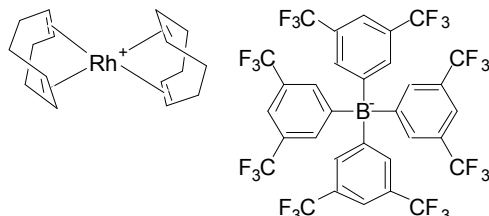

To a solution of [Rh(cod)Cl] $_2$  (100 mg, 0.2 mmol) in dry dichloromethane (3.0 mL) was added solid NaBAr $_F$  (363 mg, 0.41 mmol). Addition of 1,5-cyclooctadiene (0.075 ml, 0.6 mmol) to the orange reaction mixture resulted in immediate formation of a dark red suspension, which was stirred for 30 min at room temperature, and then filtered through a plug of Celite $^{\text{®}}$ . Evaporation of the volatiles afforded 387 mg of the complex (81% yield). The dark red solid was recrystallized from dichloromethane/hexane to give 320 mg of dark red needles (67% yield).

$^1\text{H}$  NMR (300 MHz,  $\text{CDCl}_3$ )  $\delta$  2.42 (s, 16H), 5.11 (s, 8H), 7.54 (s, 4H), 7.69 (s, 8H).  
Anal. Calcd for C $_{48}$ H $_{36}$ BF $_{24}$ Rh: C, 48.62; H, 3.07%. Found: C, 48.76; H, 3.07%.

### [Rh(biphep)(cod)](BAr $_F$ ) (1a-Rh/cod)

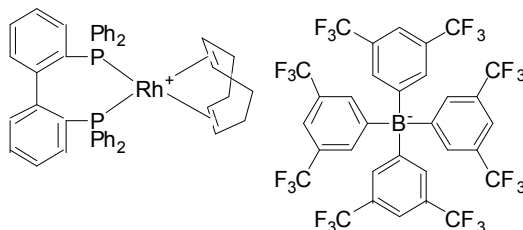

The titled compound was prepared from [Rh(cod) $_2$ ]BAr $_F$  and BIPHEP **1a** according to the procedure as described for [Rh(biphep)(cod)](SbF $_6$ ).

$^1\text{H}$  NMR (300 MHz,  $\text{CDCl}_3$ )  $\delta$  2.01-2.12 (m, 4H), 2.44-2.70 (m, 4H), 4.45-4.56 (m, 2H), 4.72-4.80 (m, 2H), 6.34-6.40 (m, 2H), 6.98-7.07 (m, 4H), 7.16-7.27 (m, 4H), 7.28-7.39 (m, 6H), 7.42-7.62 (m, 18H), 7.75 (s, 8H).

$^{31}\text{P}$  NMR (121 MHz,  $\text{CDCl}_3$ )  $\delta$  24.3 (d,  $J_{\text{Rh-P}} = 145.2$  Hz).

Anal. Calcd for C $_{76}$ H $_{52}$ BF $_{24}$ P $_2$ Rh: C, 57.16; H, 3.28%. Found: C, 57.28; H, 3.24%.

### [RhCl(**2**)] $_2$

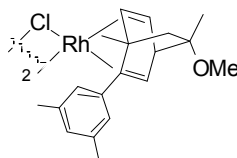

A mixture of chiral diene **2** (53.6 mg, 0.2 mmol) and [RhCl(ethylene) $_2$ ] (42.8 mg, 0.11 mmol) in dry benzene (4.0 mL) was stirred for 24 h at room temperature under argon atmosphere, and then the reaction mixture was filtered through Celite $^{\text{®}}$ . After the filtrate was evaporated under reduced pressure, the yellow residue was washed with ether twice. Prolonged evacuation of the product at 100  $^{\circ}\text{C}$  gave the solvent free complex (yield 90%).<sup>3</sup>

$^1\text{H}$  NMR (300 MHz,  $\text{CDCl}_3$ )  $\delta$  0.68 (d,  $J = 13.8$  Hz, 1H), 1.04 (s, 3H), 1.13 (d,  $J = 13.8$ , 1H), 1.65 (br s, 3H), 2.26 (br s, 6H), 3.22 (s, 3H), 3.32 (br s, 1H), 3.64 (br s, 1H), 3.71 (br m, 1H),

4.25 (br t,  $J = 6.0$  Hz, 1H), 6.80 (br s, 1H), 7.32 (br s, 2H).

$^{13}\text{C}$  NMR (75 MHz,  $\text{CDCl}_3$ )  $\delta$  21.40, 21.53, 21.82, 48.22, 49.22, 49.31, 50.23 (d,  $J_{\text{Rh-C}} = 2.5$  Hz), 51.55 (d,  $J_{\text{Rh-C}} = 11.0$  Hz), 57.00 (d,  $J_{\text{Rh-C}} = 10.9$  Hz), 71.26 (br s), 77.19, 80.90 (d,  $J_{\text{Rh-C}} = 2.5$  Hz), 128.77, 128.85, 136.14, 137.37.

Anal. Calcd for  $\text{C}_{38}\text{H}_{48}\text{Cl}_2\text{O}_2\text{Rh}_2$ : C, 56.10; H, 5.95%. Found: C, 55.41; H, 5.95%.

$[\alpha]_{\text{D}}^{28} = -13.8$  ( $c = 1.36$  in  $\text{CHCl}_3$ ).

## **[RhCl(3)]<sub>2</sub>**

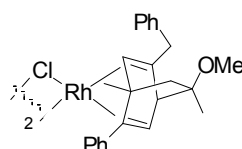

The titled compound was prepared from chiral diene **3** and  $[\text{RhCl}(\text{ethylene})_2]$  according to the procedure as described for  $[\text{RhCl}(\mathbf{2})_2]$  (yield 88%). The product was diastereomer mixture (2.5 : 1 ratio).

$^1\text{H}$  NMR (300 MHz,  $\text{CDCl}_3$ ) *major diastereomer*  $\delta$  0.89 (d,  $J = 13.8$  Hz, 1H), 1.09 (d,  $J = 13.8$  Hz, 1H), 1.14 (s, 3H), 1.78 (s, 3H), 2.91 (d,  $J = 15.9$  Hz, 1H), 3.00 (d,  $J = 15.9$  Hz, 1H), 3.07 (s, 3H), 3.30 (s, 1H), 3.40-3.42 (m, 1H), 4.06 (d,  $J = 5.4$  Hz, 1H), 7.22-7.39 (m, 6H), 7.95-8.00 (m, 4H).

$^1\text{H}$  NMR (300 MHz,  $\text{CDCl}_3$ ) *minor diastereomer*  $\delta$  0.85 (d,  $J = 14.1$  Hz, 1H), 1.03 (d,  $J = 14.1$  Hz, 1H), 1.14 (s, 3H), 1.63 (s, 3H), 3.05 (s, 3H), 3.21-3.30 (m, 3H), 3.36 (s, 1H), 4.12 (d,  $J = 6.3$  Hz, 1H), 7.22-7.39 (m, 4H), 7.52-7.47 (m, 2H), 7.79-7.81 (m, 2H), 7.95-8.00 (m, 2H).

$^{13}\text{C}$  NMR (75 MHz,  $\text{CDCl}_3$ ) *major diastereomer*  $\delta$  21.80, 41.21, 46.22 (d,  $J_{\text{Rh-C}} = 10.9$  Hz), 47.68, 49.56, 49.76 (d,  $J_{\text{Rh-C}} = 3.6$  Hz), 53.13 (d,  $J_{\text{Rh-C}} = 2.9$  Hz), 55.85 (d,  $J_{\text{Rh-C}} = 10.8$  Hz), 70.84 (d,  $J_{\text{Rh-C}} = 12.1$  Hz), 71.46 (d,  $J_{\text{Rh-C}} = 11.2$  Hz), 77.24, 81.10, 126.22, 127.12, 128.15, 130.41, 130.85, 131.12, 137.66, 138.39.

$^{13}\text{C}$  NMR (75 MHz,  $\text{CDCl}_3$ ) *mainor diastereomer*  $\delta$  21.90, 41.31, 44.90 (d,  $J_{\text{Rh-C}} = 11.6$  Hz), 47.58, 49.46, 54.12, 55.01 (d,  $J_{\text{Rh-C}} = 10.1$  Hz), 71.74 (d,  $J_{\text{Rh-C}} = 11.2$  Hz), 81.03, 120.33, 127.20, 130.92, 137.72, 138.49.

Anal. Calcd for  $\text{C}_{48}\text{H}_{52}\text{Cl}_2\text{O}_2\text{Rh}_2 \cdot 2\text{H}_2\text{O}$ : C, 57.10; H, 5.99; Cl, 6.82%. Found: C, 57.10; H, 5.99; Cl, 7.02%.

$[\alpha]_{\text{D}}^{27} = -76.2$  ( $c = 1.22$  in  $\text{CHCl}_3$ ).

FT-IR (KBr pellet,  $\text{cm}^{-1}$ ) 2964, 2824, 1599, 1448, 1260, 1071, 800, 700.

## **Preparation of BIPEHPs-Rh/diene Complexes**

### **1) Thermodynamic Chirality Control**

To a mixture of BIPHEP-Rh/cod( $\text{SbF}_6$ ) (**1a-Rh/cod**) (9.7 mg, 0.01 mmol) and chiral diene **2** (2.8 mg, 0.0105 mmol) was added dry  $(\text{CH}_2\text{Cl}_2)_2$  (1.0 mL) under argon atmosphere, and stirred for 24 or 48 h at 80 °C. After removing solvent under reduced pressure, the desired complex was washed with  $\text{Et}_2\text{O}$ , and then dried *in vacuo*. Diastereomer ratio and undesired by-product were confirmed by  $^{31}\text{P}$  NMR analysis.

### **2) Kinetic Chirality Control<sup>4</sup>**

To a mixture of  $[\text{RhCl}(\mathbf{2})_2]$  or  $[\text{RhCl}(\mathbf{3})_2]$  (0.01 mmol) and silver salt (0.019 mmol) was added dry dichloromethane (1.0 mL) under argon atmosphere, and stirred for 6 h or 24 h at room temperature. Then, a solution of BIPHEP **1a** or DM-BIPHEP **1b** (0.019 mmol) in dry dichloromethane (1.0 mL), previously prepared in another Schlenk tube, was added to the reaction mixture *via* cannula. After stirring for 2 h, the  $\text{AgCl}$  precipitate was removed by filtration under argon atmosphere through a bed of Celite<sup>®</sup>. The complexes **1a-Rh/2** or

**1b-Rh/3** were isolated by concentrating the mixture in *vacuo*, addition of a few ml of Et<sub>2</sub>O, removal supernatant liquid via syringe, washing with Et<sub>2</sub>O, and drying in *vacuo*. The diastereomer ratio and undesired by-product were confirmed by <sup>31</sup>P NMR analysis.

The diastereomer mixture (59:41) of **1a-Rh/2** was heated in dry CDCl<sub>3</sub> at 50 °C for 62 h (Figure S1).

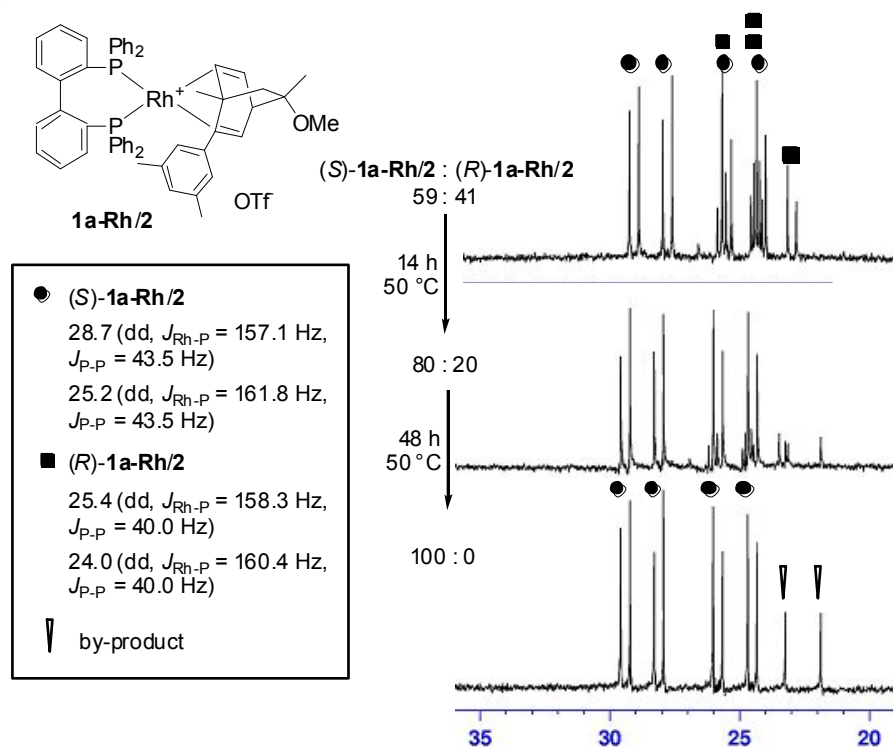

Figure S1

#### [Rh(biphep)(2)](OTf) (**1a-Rh/2**)

<sup>1</sup>H NMR (300 MHz, CDCl<sub>3</sub>) (*S*)-**1a-Rh/2** δ 0.72 (d, *J* = 13.2 Hz, 1H), 0.99 (s, 3H), 1.04 (d, *J* = 13.2 Hz, 1H), 1.54 (s, 3H), 1.85 (s, 6H), 3.21 (s, 3H), 3.46 (m, 1H), 3.60 (m, 1H), 4.55 (m, 1H), 4.82 (m, 1H), 6.05-6.08 (m, 2H), 6.80-7.78 (m, 29H).

<sup>1</sup>H NMR (300 MHz, CDCl<sub>3</sub>) (*R*)-**1a-Rh/2** δ 0.76 (d, *J* = 13.2 Hz, 1H), 1.03 (s, 3H), 1.23 (d, *J* = 13.2 Hz, 1H), 1.57 (s, 3H), 2.33 (s, 6H), 3.23 (s, 3H), 4.24 (m, 1H), 4.78 (m, 2H), 4.97 (m, 1H), 6.29-6.32 (m, 2H), 6.80-7.78 (m, 29H).

<sup>31</sup>P NMR (121 MHz, CDCl<sub>3</sub>) (*S*)-**1a-Rh/2** δ 28.7 (dd, *J*<sub>Rh-P</sub>, *J*<sub>P-P</sub> = 157.1, 43.5 Hz), 25.2 (dd, *J*<sub>Rh-P</sub>, *J*<sub>P-P</sub> = 161.8, 43.5 Hz); (*R*)-**1a-Rh/2** δ 25.4 (dd, *J*<sub>Rh-P</sub>, *J*<sub>P-P</sub> = 158.3, 40.0 Hz), 24.0 (dd, *J*<sub>Rh-P</sub>, *J*<sub>P-P</sub> = 160.4, 40.0 Hz).

#### [Rh(biphep)(2)](SbF<sub>6</sub>) (**1a-Rh/2**)<sup>4</sup>

<sup>1</sup>H NMR (300 MHz, CDCl<sub>3</sub>) (*S*)-**1a-Rh/2** δ 0.73 (d, *J* = 13.2 Hz, 1H), 0.99 (s, 3H), 1.02 (d, *J* = 13.2 Hz, 1H), 1.54 (s, 3H), 1.86 (s, 6H), 3.21 (s, 3H), 3.42 (br s, 1H), 3.75 (m, 1H), 4.56 (br s, 1H), 4.80 (br s, 1H), 6.05-6.08 (m, 2H), 6.80-7.78 (m, 29H).

<sup>31</sup>P NMR (121 MHz, CDCl<sub>3</sub>) (*S*)-**1a-Rh/2** δ 28.8 (dd, *J*<sub>Rh-P</sub>, *J*<sub>P-P</sub> = 157.3, 43.9 Hz), 25.1 (dd, *J*<sub>Rh-P</sub>, *J*<sub>P-P</sub> = 162.0, 43.9 Hz).

**[Rh{(S)-dm-biphep}(3)](X) ((S)-1b-Rh/3)**

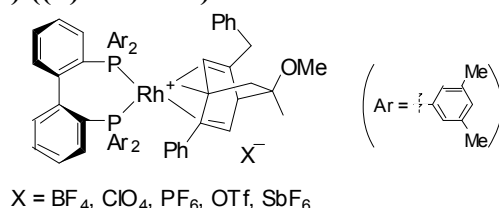

X = BF<sub>4</sub>, ClO<sub>4</sub>, PF<sub>6</sub>, OTf, SbF<sub>6</sub>

**X = BF<sub>4</sub>**

<sup>1</sup>H NMR (300 MHz, CDCl<sub>3</sub>) δ 0.60 (d, *J* = 13.2 Hz, 1H), 0.66 (d, *J* = 13.2 Hz, 1H), 0.91 (s, 3H), 1.69 (s, 3H), 2.17 (s, 6H), 2.20 (s, 3H), 2.31 (s, 6H), 2.34 (s, 6H), 2.46 (s, 6H), 2.82 (d, *J* = 14.1 Hz, 1H), 3.52 (d, *J* = 15.9 Hz, 1H), 3.71 (d, *J* = 15.9 Hz, 1H), 4.28 (m, 1H), 4.62 (d, *J* = 6.3 Hz, 1H), 5.86-5.89 (m, 1H), 6.00-6.03 (m, 1H), 6.66-7.55 (m, 27H), 7.87-7.93 (m, 1H).

<sup>31</sup>P NMR (121 MHz, CDCl<sub>3</sub>) δ 21.7 (dd, *J*<sub>Rh-P</sub>, *J*<sub>P-P</sub> = 157.9, 46.0 Hz), 27.4 (dd, *J*<sub>Rh-P</sub>, *J*<sub>P-P</sub> = 161.8, 46.0 Hz).

Anal. Calcd for C<sub>68</sub>H<sub>70</sub>BF<sub>4</sub>OP<sub>2</sub>Rh·2CH<sub>2</sub>Cl<sub>2</sub>: C, 63.46; H, 5.63%. Found: C, 63.71; H, 5.58%.

[α]<sub>D</sub><sup>27</sup> = +34.0 (c = 0.08 in CHCl<sub>3</sub>).

FT-IR (KBr pellet, cm<sup>-1</sup>) 2972, 1420, 1260, 1032, 759, 476.

**X = ClO<sub>4</sub>**

<sup>1</sup>H NMR (300 MHz, CDCl<sub>3</sub>) δ 0.63 (d, *J* = 13.2 Hz, 1H), 0.69 (d, *J* = 13.2 Hz, 1H), 0.92 (s, 3H), 1.68 (s, 3H), 2.16 (s, 6H), 2.17 (s, 3H), 2.30 (s, 6H), 2.35 (s, 6H), 2.46 (s, 6H), 2.80 (d, *J* = 14.1 Hz, 1H), 3.49 (d, *J* = 14.1 Hz, 1H), 3.56 (d, *J* = 14.1 Hz, 1H), 4.33 (m, 1H), 4.74 (d, *J* = 6.0 Hz, 1H), 5.85-5.88 (m, 1H), 6.00-6.04 (m, 1H), 6.73-7.57 (m, 27H), 7.89-7.95 (m, 1H).

<sup>31</sup>P NMR (121 MHz, CDCl<sub>3</sub>) δ 21.5 (dd, *J*<sub>Rh-P</sub>, *J*<sub>P-P</sub> = 157.7, 46.0 Hz), 27.4 (dd, *J*<sub>Rh-P</sub>, *J*<sub>P-P</sub> = 161.5, 46.0 Hz).

Anal. Calcd for C<sub>68</sub>H<sub>70</sub>ClO<sub>5</sub>P<sub>2</sub>Rh·3/2CH<sub>2</sub>Cl<sub>2</sub>: C, 64.46; H, 5.68%. Found: C, 64.65; H, 5.42%.

[α]<sub>D</sub><sup>28</sup> = +23.5 (c = 0.18 in CHCl<sub>3</sub>).

FT-IR (KBr pellet, cm<sup>-1</sup>) 2920, 1602, 1458, 1428, 1095, 758, 623.

**X = PF<sub>6</sub>**

<sup>1</sup>H NMR (300 MHz, CDCl<sub>3</sub>) δ 0.63 (d, *J* = 13.2 Hz, 1H), 0.69 (d, *J* = 13.2 Hz, 1H), 0.92 (s, 3H), 1.67 (s, 3H), 2.17 (s, 6H), 2.23 (s, 3H), 2.30 (s, 6H), 2.33 (s, 6H), 2.46 (s, 6H), 2.82 (d, *J* = 14.1 Hz, 1H), 3.52 (d, *J* = 16.2 Hz, 1H), 3.71 (d, *J* = 16.2 Hz, 1H), 4.35 (m, 1H), 4.67 (d, *J* = 6.3 Hz, 1H), 5.85-5.89 (m, 1H), 6.02-6.06 (m, 1H), 6.66-7.55 (m, 27H), 7.90-7.96 (m, 1H).

<sup>31</sup>P NMR (121 MHz, CDCl<sub>3</sub>) δ 21.3 (dd, *J*<sub>Rh-P</sub>, *J*<sub>P-P</sub> = 157.4, 45.7 Hz), 27.6 (dd, *J*<sub>Rh-P</sub>, *J*<sub>P-P</sub> = 161.5, 45.7 Hz).

Anal. Calcd for C<sub>68</sub>H<sub>70</sub>F<sub>6</sub>OP<sub>3</sub>Rh·3/2CH<sub>2</sub>Cl<sub>2</sub>: C, 62.27; H, 5.49%. Found: C, 62.58; H, 5.37%.

[α]<sub>D</sub><sup>25</sup> = +35.3 (c = 0.09 in CHCl<sub>3</sub>).

FT-IR (KBr pellet, cm<sup>-1</sup>) 2963, 1600, 1262, 1070, 840, 801, 695.

**X = OTf**

<sup>1</sup>H NMR (300 MHz, CDCl<sub>3</sub>) δ 0.66 (br s, 2H), 0.90 (s, 3H), 1.69 (s, 3H), 2.15 (s, 6H), 2.20 (s, 3H), 2.29 (s, 6H), 2.34 (s, 6H), 2.47 (s, 6H), 2.86 (d, *J* = 14.1 Hz, 1H), 3.34 (d, *J* = 15.0 Hz, 1H), 3.70 (d, *J* = 15.0 Hz, 1H), 4.20 (m, 1H), 4.40 (d, *J* = 6.3 Hz, 1H), 5.88-5.91 (m, 1H), 6.00-6.03 (m, 1H), 6.67-7.58 (m, 27H), 7.82-7.88 (m, 1H).

<sup>31</sup>P NMR (121 MHz, CDCl<sub>3</sub>) δ 21.4 (dd, *J*<sub>Rh-P</sub>, *J*<sub>P-P</sub> = 157.4, 46.1 Hz), 27.1 (dd, *J*<sub>Rh-P</sub>, *J*<sub>P-P</sub> = 161.3, 46.1 Hz).

Anal. Calcd for C<sub>69</sub>H<sub>70</sub>F<sub>3</sub>O<sub>4</sub>P<sub>2</sub>RhS·4CH<sub>2</sub>Cl<sub>2</sub>: C, 56.31; H, 5.05; S, 2.06%. Found: C, 56.46; H, 4.76; S, 2.11%.

[α]<sub>D</sub><sup>27</sup> = +14.2 (c = 0.05 in CHCl<sub>3</sub>).

FT-IR (KBr pellet, cm<sup>-1</sup>) 2962, 1602, 1261, 1029, 799.

**X = SbF<sub>6</sub>**

<sup>31</sup>P NMR (121 MHz, CDCl<sub>3</sub>) δ 21.4 (dd, *J*<sub>Rh-P</sub>, *J*<sub>P-P</sub> = 157.7, 45.7 Hz), 27.6 (dd, *J*<sub>Rh-P</sub>, *J*<sub>P-P</sub> = 161.5, 45.7 Hz).

[α]<sub>D</sub><sup>26</sup> = +12.5 (c = 0.13 in CHCl<sub>3</sub>).

FT-IR (KBr pellet, cm<sup>-1</sup>) 2921, 1602, 1459, 1125, 850, 660.

### Typical Experiment Procedure of Asymmetric Hydrogenation by (*S*)-**1b-Rh/3**

To a mixture of (*S*)-**1b-Rh/3** (11.5 mg, 0.01 mmol) prepared by kinetic chirality control described above and 2-acetamidoacrylic acid methyl ester **5** (7.2 mg, 0.05 mmol) in 10 mL Schlenk tube was added dry dichloromethane (0.5 mL) under argon atmosphere. A mixture was charged with hydrogen gas using balloon (1 atm), then stirred for 24 h at 0 °C. The solvent was concentrated under reduced pressure. The product **6** was isolated by flash chromatography using dichloromethane/MeOH (19:1). *Ee* values was determined by chiral GC analysis; GC (column: CP Chirasil Dex CB, i.d. 0.32 mm x 25 m, CHROMPACK; carrier gas: nitrogen 75 kPa; column temperature: 100 °C; injection and detection temperature: 130 °C), *t*<sub>R</sub> (*S* isomer) = 10.9 min, *t*<sub>R</sub> of (*R* isomer) = 11.7 min.

It was confirmed by <sup>31</sup>P NMR analysis after the reaction that racemization of DM-BIPHEP moiety and decomposition of complex didn't occur during the course of reaction (Figure S2).

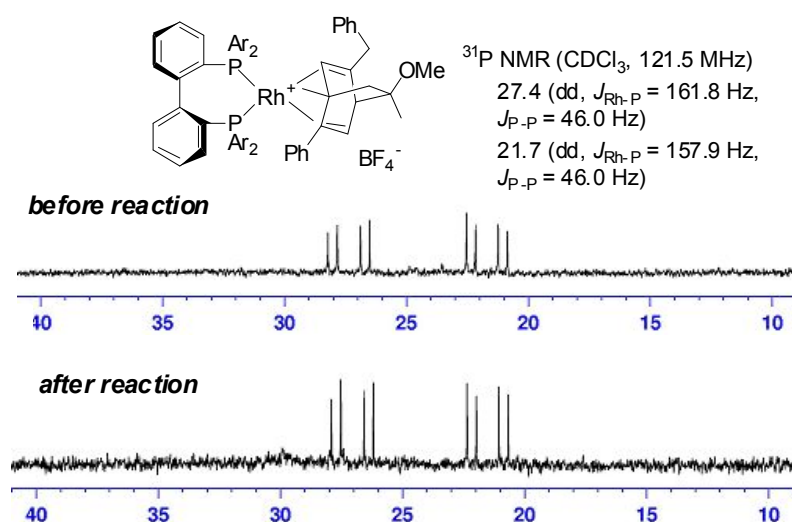

Figure S2

### 2-Acetamidoacrylic acid methyl ester (**5**)

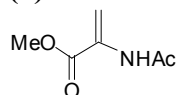

The titled compound is commercially available.

<sup>1</sup>H NMR (300 MHz, CDCl<sub>3</sub>) δ 2.13 (s, 3H), 3.85 (s, 3H), 5.88 (s, 1H), 6.60 (s, 1H), 7.74 (br s, 1H).

### 2-Acetamidopropionic acid methyl ester (**6**)<sup>5</sup>

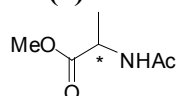

<sup>1</sup>H NMR (300 MHz, CDCl<sub>3</sub>) δ 1.39 (d, *J* = 6.9 Hz, 2H), 2.00 (s, 3H), 3.74 (s, 3H), 4.59 (qd, *J*

= 6.9, 6.9 Hz, 1H), 6.16 (br s, 1H).

GC (column, CP Chirasil Dex CB, i.d. 0.32 mm x 25 m, CHROMPACK, GL Sciences Inc.; carrier gas, nitrogen 75 kPa; column, 100 °C; injection and detection temp, 130 °C),  $t_R$  of minor-isomer 10.9 min(*S*),  $t_R$  of major-isomer 11.7 min(*R*).

B3LYP optimized geometry and energy

Basis sets used are SDD on Rh and 6-31G(d) on H, C, and P atoms.

**(*S*)-1a-Rh/3'**

Favored

E(B3LYP) = -2994.10114956 au

Zero-point vibrational energy = 555.11265 (Kcal/Mol)

Standard orientation:

| Center<br>Number | Atomic<br>Number | Atomic<br>Type | Coordinates (Angstroms) |           |           |
|------------------|------------------|----------------|-------------------------|-----------|-----------|
|                  |                  |                | X                       | Y         | Z         |
| 1                | 45               | 0              | -0.324132               | -0.497442 | -0.099982 |
| 2                | 15               | 0              | 1.837964                | -0.285820 | 0.874328  |
| 3                | 15               | 0              | -0.370716               | 1.796560  | -0.680737 |
| 4                | 6                | 0              | 2.120581                | 1.312833  | 1.783391  |
| 5                | 6                | 0              | 2.187893                | 1.331401  | 3.185663  |
| 6                | 6                | 0              | 2.374549                | 2.517852  | 3.895300  |
| 7                | 6                | 0              | 2.509849                | 3.719114  | 3.205936  |
| 8                | 6                | 0              | 2.466861                | 3.714459  | 1.813626  |
| 9                | 6                | 0              | 2.268766                | 2.533812  | 1.078925  |
| 10               | 6                | 0              | 1.247402                | 2.468437  | -1.302723 |
| 11               | 6                | 0              | 1.422662                | 2.767565  | -2.663180 |
| 12               | 6                | 0              | 2.639125                | 3.236778  | -3.159089 |
| 13               | 6                | 0              | 3.710182                | 3.426399  | -2.291059 |
| 14               | 6                | 0              | 3.544083                | 3.158177  | -0.934280 |
| 15               | 6                | 0              | 2.331886                | 2.676399  | -0.413933 |
| 16               | 6                | 0              | -1.556650               | 2.073047  | -2.077042 |
| 17               | 6                | 0              | -2.647894               | 2.948873  | -1.982870 |
| 18               | 6                | 0              | -3.553101               | 3.074860  | -3.042035 |
| 19               | 6                | 0              | -3.379885               | 2.335083  | -4.210600 |
| 20               | 6                | 0              | -2.301451               | 1.450848  | -4.313791 |
| 21               | 6                | 0              | -1.407974               | 1.311878  | -3.252961 |
| 22               | 6                | 0              | -0.507811               | -2.742493 | -0.798886 |
| 23               | 6                | 0              | -0.746198               | -2.611882 | 0.567531  |
| 24               | 6                | 0              | -2.203264               | -2.358206 | 0.938064  |
| 25               | 6                | 0              | -2.541572               | -1.044036 | 0.243411  |
| 26               | 6                | 0              | -2.253740               | -1.095789 | -1.112991 |
| 27               | 6                | 0              | -1.774212               | -2.453451 | -1.605000 |



|    |   |   |           |           |           |
|----|---|---|-----------|-----------|-----------|
| 28 | 1 | 0 | 2.113324  | 0.406052  | 3.742419  |
| 29 | 1 | 0 | 2.424094  | 2.492984  | 4.980118  |
| 30 | 1 | 0 | 2.658758  | 4.652227  | 3.741365  |
| 31 | 1 | 0 | 2.580981  | 4.647275  | 1.269710  |
| 32 | 1 | 0 | 0.595700  | 2.656040  | -3.352511 |
| 33 | 1 | 0 | 2.737423  | 3.460439  | -4.217456 |
| 34 | 1 | 0 | 4.664238  | 3.792050  | -2.659295 |
| 35 | 1 | 0 | 4.371916  | 3.317353  | -0.250020 |
| 36 | 1 | 0 | -2.800506 | 3.539516  | -1.086885 |
| 37 | 1 | 0 | -4.391706 | 3.758934  | -2.948262 |
| 38 | 1 | 0 | -4.079816 | 2.440607  | -5.034351 |
| 39 | 1 | 0 | -2.160467 | 0.864830  | -5.217784 |
| 40 | 1 | 0 | -0.591699 | 0.598323  | -3.333628 |
| 41 | 1 | 0 | -2.341899 | -2.298694 | 2.020340  |
| 42 | 1 | 0 | -1.602752 | -2.451160 | -2.680792 |
| 43 | 1 | 0 | -0.058957 | -2.983106 | 1.316608  |
| 44 | 1 | 0 | -2.639913 | -0.364511 | -1.812887 |
| 45 | 6 | 0 | 3.334299  | -0.399147 | -0.192142 |
| 46 | 6 | 0 | 4.603720  | -0.070116 | 0.315848  |
| 47 | 6 | 0 | 3.218768  | -0.814603 | -1.523924 |
| 48 | 6 | 0 | 5.732960  | -0.167529 | -0.495348 |
| 49 | 1 | 0 | 4.709305  | 0.266579  | 1.343409  |
| 50 | 6 | 0 | 4.351553  | -0.907195 | -2.336105 |
| 51 | 1 | 0 | 2.243555  | -1.066049 | -1.925931 |
| 52 | 6 | 0 | 5.608258  | -0.585826 | -1.823867 |
| 53 | 1 | 0 | 6.709603  | 0.086017  | -0.092536 |
| 54 | 1 | 0 | 4.247839  | -1.232231 | -3.367239 |
| 55 | 1 | 0 | 6.489319  | -0.657743 | -2.455395 |
| 56 | 6 | 0 | -0.858202 | 3.038895  | 0.589047  |
| 57 | 6 | 0 | -0.808196 | 4.414349  | 0.301555  |
| 58 | 6 | 0 | -1.266252 | 2.624271  | 1.862959  |
| 59 | 6 | 0 | -1.182450 | 5.349335  | 1.265400  |
| 60 | 1 | 0 | -0.473928 | 4.755246  | -0.674464 |
| 61 | 6 | 0 | -1.635448 | 3.562364  | 2.829652  |
| 62 | 1 | 0 | -1.273670 | 1.565524  | 2.101190  |
| 63 | 6 | 0 | -1.599640 | 4.924413  | 2.530410  |
| 64 | 1 | 0 | -1.145397 | 6.409457  | 1.030978  |
| 65 | 1 | 0 | -1.945811 | 3.228417  | 3.815734  |
| 66 | 1 | 0 | -1.888899 | 5.654707  | 3.280743  |
| 67 | 6 | 0 | -3.453955 | -0.026408 | 0.893460  |
| 68 | 1 | 0 | -3.430807 | 0.902334  | 0.312878  |
| 69 | 1 | 0 | -3.088615 | 0.207800  | 1.899061  |
| 70 | 6 | 0 | -4.888179 | -0.534618 | 0.996410  |
| 71 | 6 | 0 | -5.727391 | -0.529599 | -0.126856 |
| 72 | 6 | 0 | -5.389761 | -1.025211 | 2.208514  |
| 73 | 6 | 0 | -7.034937 | -1.008103 | -0.040944 |
| 74 | 1 | 0 | -5.357874 | -0.138108 | -1.072256 |
| 75 | 6 | 0 | -6.697952 | -1.507088 | 2.297294  |

|     |   |   |           |           |           |
|-----|---|---|-----------|-----------|-----------|
| 76  | 1 | 0 | -4.756745 | -1.021719 | 3.093479  |
| 77  | 6 | 0 | -7.523119 | -1.501606 | 1.171795  |
| 78  | 1 | 0 | -7.675306 | -0.990233 | -0.918567 |
| 79  | 1 | 0 | -7.072527 | -1.879847 | 3.246591  |
| 80  | 1 | 0 | -8.541903 | -1.872075 | 1.239776  |
| 81  | 6 | 0 | 0.659755  | -3.414888 | -1.413869 |
| 82  | 6 | 0 | 0.912829  | -3.313098 | -2.795854 |
| 83  | 6 | 0 | 1.523140  | -4.219709 | -0.644537 |
| 84  | 6 | 0 | 1.987361  | -3.979211 | -3.382710 |
| 85  | 1 | 0 | 0.272005  | -2.701268 | -3.422594 |
| 86  | 6 | 0 | 2.598484  | -4.882801 | -1.231086 |
| 87  | 1 | 0 | 1.341707  | -4.347106 | 0.417169  |
| 88  | 6 | 0 | 2.836566  | -4.766469 | -2.602613 |
| 89  | 1 | 0 | 2.156406  | -3.888673 | -4.452090 |
| 90  | 1 | 0 | 3.243535  | -5.505118 | -0.617401 |
| 91  | 1 | 0 | 3.668878  | -5.293250 | -3.060155 |
| 92  | 6 | 0 | -3.067088 | -3.505682 | 0.313703  |
| 93  | 6 | 0 | -2.843271 | -3.530533 | -1.217718 |
| 94  | 1 | 0 | -2.761755 | -4.452160 | 0.773201  |
| 95  | 1 | 0 | -4.119625 | -3.344241 | 0.561169  |
| 96  | 1 | 0 | -2.503596 | -4.514576 | -1.557935 |
| 97  | 1 | 0 | -3.770097 | -3.301529 | -1.754337 |
| 98  | 6 | 0 | 2.096652  | -1.582438 | 2.172294  |
| 99  | 6 | 0 | 3.205909  | -2.440051 | 2.175924  |
| 100 | 6 | 0 | 1.118465  | -1.746076 | 3.172006  |
| 101 | 6 | 0 | 3.340270  | -3.423879 | 3.161015  |
| 102 | 1 | 0 | 3.969313  | -2.348514 | 1.412109  |
| 103 | 6 | 0 | 1.259908  | -2.719077 | 4.160446  |
| 104 | 1 | 0 | 0.237132  | -1.109145 | 3.172350  |
| 105 | 6 | 0 | 2.374311  | -3.563571 | 4.156601  |
| 106 | 1 | 0 | 4.207569  | -4.077990 | 3.147425  |
| 107 | 1 | 0 | 0.499745  | -2.821178 | 4.929985  |
| 108 | 1 | 0 | 2.484419  | -4.324966 | 4.923298  |

-----  
**(R)-1a-Rh/3'**

Disfavored

E(B3LYP) = -2994.09331395 au

Zero-point vibrational energy = 555.04815 (Kcal/Mol)

Standard orientation:

| Center<br>Number | Atomic<br>Number | Atomic<br>Type | Coordinates (Angstroms) |           |          |
|------------------|------------------|----------------|-------------------------|-----------|----------|
|                  |                  |                | X                       | Y         | Z        |
| 1                | 45               | 0              | 0.384089                | -0.485295 | 0.015721 |

|    |    |   |           |           |           |
|----|----|---|-----------|-----------|-----------|
| 2  | 15 | 0 | -1.726862 | -0.460001 | -0.983741 |
| 3  | 6  | 0 | -2.893876 | 0.058668  | 0.347372  |
| 4  | 15 | 0 | 0.131344  | 1.865898  | 0.536573  |
| 5  | 6  | 0 | 0.993272  | -2.584467 | -0.362343 |
| 6  | 6  | 0 | 0.593194  | -2.556415 | 0.980990  |
| 7  | 6  | 0 | -1.881912 | 0.655613  | -2.445545 |
| 8  | 6  | 0 | -2.435714 | -1.982734 | -1.771493 |
| 9  | 6  | 0 | -3.429919 | -0.960186 | 1.157191  |
| 10 | 6  | 0 | -3.112342 | 1.408477  | 0.715058  |
| 11 | 6  | 0 | -1.224892 | 2.947153  | -0.162688 |
| 12 | 6  | 0 | 1.678030  | 2.800552  | 0.150751  |
| 13 | 6  | 0 | -0.128900 | 2.121311  | 2.347895  |
| 14 | 6  | 0 | 2.480458  | -2.333732 | -0.577786 |
| 15 | 6  | 0 | 1.747935  | -2.118833 | 1.887004  |
| 16 | 6  | 0 | -0.591454 | -3.251404 | 1.540260  |
| 17 | 6  | 0 | -3.132336 | 1.059955  | -2.935391 |
| 18 | 6  | 0 | -0.727977 | 0.961127  | -3.180553 |
| 19 | 6  | 0 | -1.607262 | -2.668651 | -2.676977 |
| 20 | 6  | 0 | -3.771240 | -2.392511 | -1.643998 |
| 21 | 6  | 0 | -4.217624 | -0.671309 | 2.269176  |
| 22 | 6  | 0 | -3.916864 | 1.674364  | 1.838159  |
| 23 | 6  | 0 | -2.594545 | 2.608853  | -0.015613 |
| 24 | 6  | 0 | -0.901476 | 4.170661  | -0.771826 |
| 25 | 6  | 0 | 2.552840  | 3.240175  | 1.155611  |
| 26 | 6  | 0 | 2.042482  | 2.997572  | -1.194562 |
| 27 | 6  | 0 | -0.294619 | 3.416035  | 2.870492  |
| 28 | 6  | 0 | -0.193256 | 1.024655  | 3.216905  |
| 29 | 6  | 0 | 2.701546  | -0.932754 | -0.023372 |
| 30 | 6  | 0 | 3.283595  | -3.360673 | 0.287888  |
| 31 | 6  | 0 | 2.252845  | -0.813085 | 1.281782  |
| 32 | 6  | 0 | 2.876803  | -3.197337 | 1.772616  |
| 33 | 6  | 0 | -1.288192 | -4.219004 | 0.788666  |
| 34 | 6  | 0 | -1.020203 | -3.014303 | 2.860592  |
| 35 | 6  | 0 | -3.221065 | 1.776812  | -4.127603 |
| 36 | 6  | 0 | -0.819580 | 1.671690  | -4.379906 |
| 37 | 6  | 0 | -2.086164 | -3.760566 | -3.400575 |
| 38 | 6  | 0 | -4.248807 | -3.487972 | -2.367784 |
| 39 | 6  | 0 | -4.472594 | 0.655945  | 2.607163  |
| 40 | 6  | 0 | -3.566285 | 3.504278  | -0.491957 |
| 41 | 6  | 0 | -1.883273 | 5.039952  | -1.247859 |
| 42 | 6  | 0 | 3.757971  | 3.866833  | 0.823078  |
| 43 | 6  | 0 | 3.235904  | 3.638883  | -1.522428 |
| 44 | 6  | 0 | -0.496868 | 3.603708  | 4.237013  |
| 45 | 6  | 0 | -0.400708 | 1.214198  | 4.585555  |
| 46 | 6  | 0 | 3.623220  | 0.030417  | -0.735432 |
| 47 | 6  | 0 | -2.371361 | -4.908025 | 1.330673  |
| 48 | 6  | 0 | -2.099531 | -3.707302 | 3.405341  |
| 49 | 6  | 0 | -2.065983 | 2.083487  | -4.852541 |

|    |   |   |           |           |           |
|----|---|---|-----------|-----------|-----------|
| 50 | 6 | 0 | -3.408227 | -4.181146 | -3.238910 |
| 51 | 6 | 0 | -3.226338 | 4.704138  | -1.111255 |
| 52 | 6 | 0 | 4.100723  | 4.072046  | -0.513285 |
| 53 | 6 | 0 | -0.547845 | 2.503109  | 5.097829  |
| 54 | 6 | 0 | 5.037207  | -0.527971 | -0.851294 |
| 55 | 6 | 0 | -2.782173 | -4.657198 | 2.642481  |
| 56 | 6 | 0 | 5.893645  | -0.524168 | 0.259268  |
| 57 | 6 | 0 | 5.505825  | -1.059492 | -2.059163 |
| 58 | 6 | 0 | 7.184922  | -1.043685 | 0.165365  |
| 59 | 6 | 0 | 6.798201  | -1.580993 | -2.156630 |
| 60 | 6 | 0 | 7.640116  | -1.576565 | -1.043715 |
| 61 | 1 | 0 | 0.423597  | -3.111637 | -1.116709 |
| 62 | 1 | 0 | -3.225398 | -1.998619 | 0.924438  |
| 63 | 1 | 0 | 2.757476  | -2.401464 | -1.632269 |
| 64 | 1 | 0 | 1.445262  | -1.989122 | 2.925592  |
| 65 | 1 | 0 | -4.038384 | 0.813659  | -2.388925 |
| 66 | 1 | 0 | 0.241840  | 0.631270  | -2.814424 |
| 67 | 1 | 0 | -0.588572 | -2.328990 | -2.841699 |
| 68 | 1 | 0 | -4.451707 | -1.860102 | -0.989436 |
| 69 | 1 | 0 | -4.620584 | -1.484192 | 2.865587  |
| 70 | 1 | 0 | -4.087862 | 2.710229  | 2.114981  |
| 71 | 1 | 0 | 0.134111  | 4.469366  | -0.868076 |
| 72 | 1 | 0 | 2.298302  | 3.102186  | 2.200880  |
| 73 | 1 | 0 | 1.384878  | 2.659267  | -1.990526 |
| 74 | 1 | 0 | -0.267822 | 4.278307  | 2.210618  |
| 75 | 1 | 0 | -0.101037 | 0.023010  | 2.809649  |
| 76 | 1 | 0 | 4.355263  | -3.197102 | 0.147190  |
| 77 | 1 | 0 | 3.053732  | -4.368187 | -0.075991 |
| 78 | 1 | 0 | 2.524203  | 0.027822  | 1.913721  |
| 79 | 1 | 0 | 3.726789  | -2.870032 | 2.380993  |
| 80 | 1 | 0 | 2.517167  | -4.140813 | 2.196822  |
| 81 | 1 | 0 | -0.972283 | -4.451081 | -0.222084 |
| 82 | 1 | 0 | -0.513563 | -2.275854 | 3.472638  |
| 83 | 1 | 0 | -4.193768 | 2.090809  | -4.495523 |
| 84 | 1 | 0 | 0.080557  | 1.898065  | -4.945042 |
| 85 | 1 | 0 | -1.429674 | -4.275676 | -4.096308 |
| 86 | 1 | 0 | -5.285626 | -3.791668 | -2.253310 |
| 87 | 1 | 0 | -5.086917 | 0.900408  | 3.468825  |
| 88 | 1 | 0 | -4.613021 | 3.239105  | -0.373992 |
| 89 | 1 | 0 | -1.590377 | 5.976615  | -1.713224 |
| 90 | 1 | 0 | 4.423071  | 4.201055  | 1.614346  |
| 91 | 1 | 0 | 3.494538  | 3.794601  | -2.566037 |
| 92 | 1 | 0 | -0.618812 | 4.609132  | 4.629874  |
| 93 | 1 | 0 | -0.453119 | 0.355223  | 5.248994  |
| 94 | 1 | 0 | 3.644076  | 0.981846  | -0.200142 |
| 95 | 1 | 0 | 3.234765  | 0.230234  | -1.741155 |
| 96 | 1 | 0 | -2.885238 | -5.653293 | 0.730560  |
| 97 | 1 | 0 | -2.403763 | -3.508243 | 4.429034  |

|     |   |   |           |           |           |
|-----|---|---|-----------|-----------|-----------|
| 98  | 1 | 0 | -2.140083 | 2.635352  | -5.785177 |
| 99  | 1 | 0 | -3.783744 | -5.031701 | -3.800354 |
| 100 | 1 | 0 | -4.004787 | 5.369348  | -1.473411 |
| 101 | 1 | 0 | 5.033930  | 4.565227  | -0.768906 |
| 102 | 1 | 0 | -0.708330 | 2.652242  | 6.161777  |
| 103 | 1 | 0 | -3.617212 | -5.205479 | 3.069085  |
| 104 | 1 | 0 | 5.549168  | -0.103790 | 1.201841  |
| 105 | 1 | 0 | 4.860026  | -1.055618 | -2.934841 |
| 106 | 1 | 0 | 7.838192  | -1.027564 | 1.033464  |
| 107 | 1 | 0 | 7.147237  | -1.984630 | -3.103046 |
| 108 | 1 | 0 | 8.646305  | -1.978825 | -1.118343 |

---

### References for Supporting Information

- 1) C. Fischer, C. Defieber, T. Suzuki, E. M. Carreira, *J. Am. Chem. Soc.* **2004**, *126*, 1628.
- 2) J. Paquin, C. Defieber, C. R. J. Stephenson, E. M. Carreira, E. M. *J. Am. Chem. Soc.* **2005**, *127*, 10850.
- 3) A. Kina, K. Ueyama, T. Hayashi, *Org. Lett.* **2005**, *7*, 5889.
- 4) J. W. Faller, J. C. Wilt, *J. Organomet. Chem.* **2006**, *691*, 2207.
- 5) A. Zanotti-Gerosa, C. Malan, D. Herzberg, *Org. Lett.* **2001**, *3*, 3687.
